# Supplementary material for: Rapid Screening of Forskolin-Type Diterpenoids of Blumea aromatica DC Using Ultra-High-Performance Liquid Chromatography Tandem Quadrupole Time-Of-Flight Mass Spectrometry Based on the Mass Defect Filtering Approach
Source: MDPI journal article supplement (doi:10.3390/molecules24173073), 2019-08-23
Supplement: s1 [file s1]

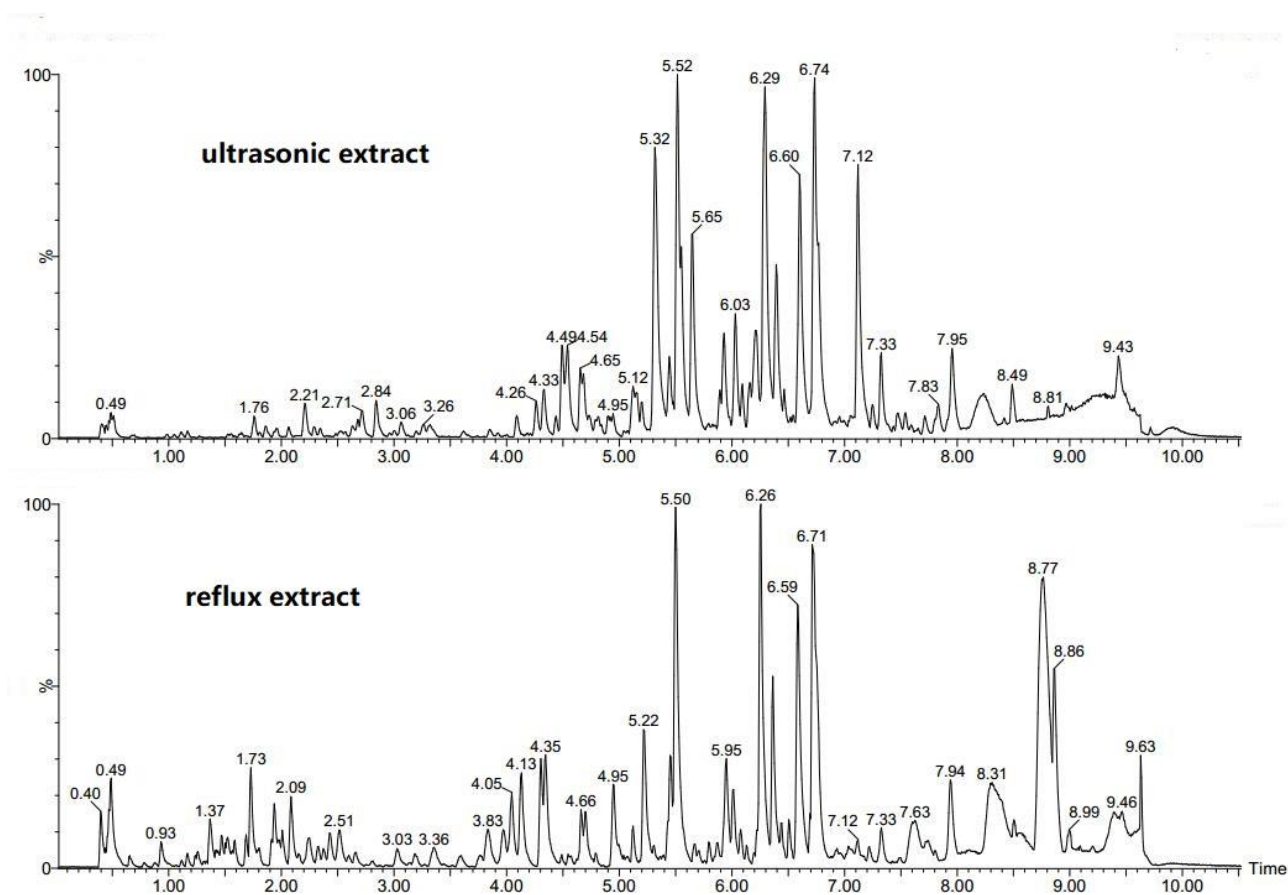

**Figure S1.** Chromatograms of *B. aromatica* extract with different extract method

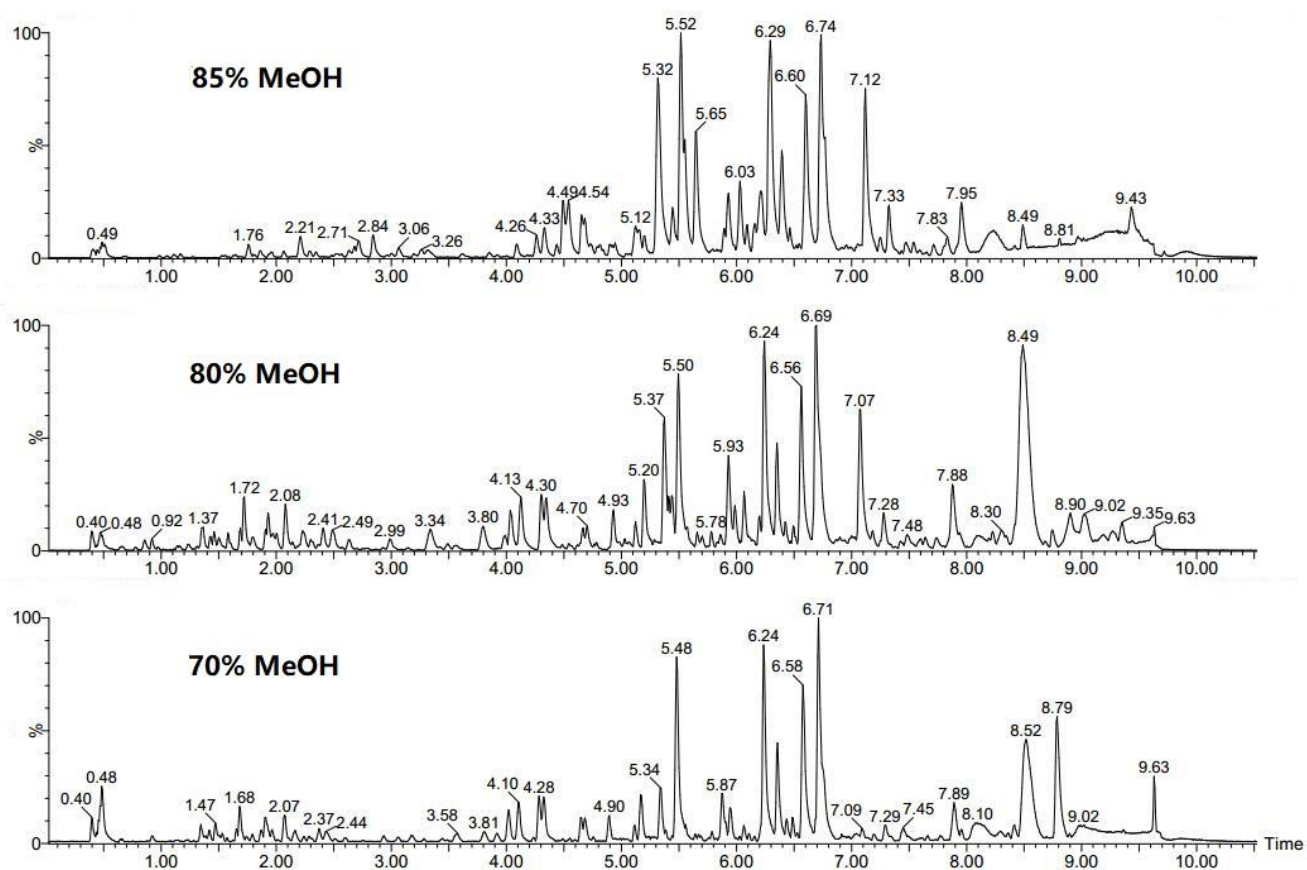

**Figure S2.** Chromatograms of *B. aromatica* extract with different extract solvent

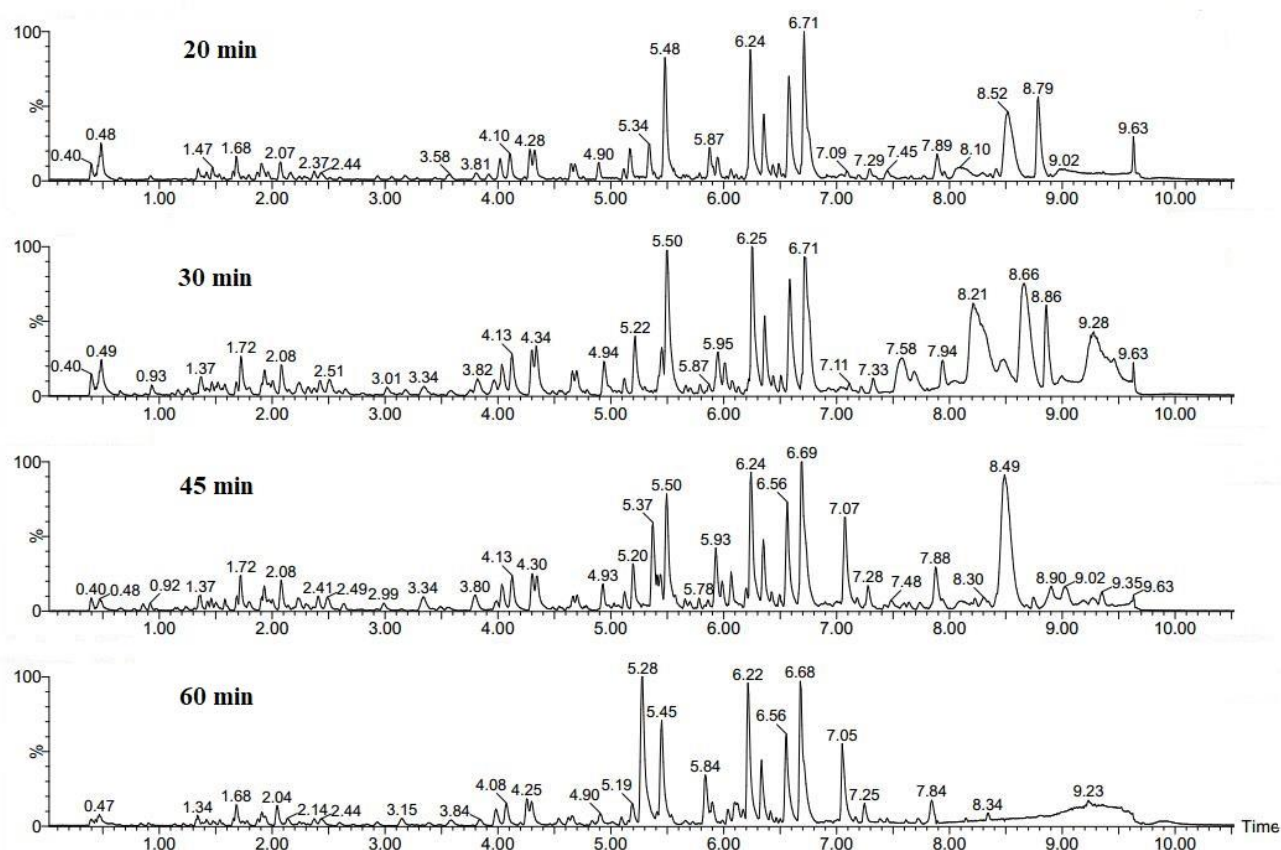

**Figure S3.** Chromatograms of *B. aromatica* extract with different extract time
